# Supplementary material for: Walking Speed Classification from Marker-Free Video Images in Two-Dimension Using Optimum Data and a Deep Learning Method
Source: MDPI journal article supplement (doi:10.3390/bioengineering9110715), 2022-11-19
Supplement: s1 [file s1]

## Supplementary material

Table S1 classification accuracies for walking speed classification using walk pattern established with five RBBMs in our previous study [13].

| RBBMs combination     | Mean( $\pm$ SD) accuracy (%) | Median accuracy (%) | Mean( $\pm$ SD) training time (mint.) |
|-----------------------|------------------------------|---------------------|---------------------------------------|
| HW1, HW2, HW3, A1, A2 | 88.05( $\pm$ 8.85)           | 89.58               | 17.43( $\pm$ 2.03)                    |

study [13] refers to our previous study T. Sikandar *et al.*, “Using a Deep Learning Method and Data from Two-Dimensional (2D) Marker-Less Video-Based Images for Walking Speed Classification,” *Sensors*, vol. 21, no. 8, p. 2836, 2021.

Table S2 classification accuracies for walking speed classification using walk pattern established with four RBBMs.

| RBBMs combination | Mean( $\pm$ SD) accuracy (%) | Median accuracy (%) | Mean( $\pm$ SD) training time (mint.) |
|-------------------|------------------------------|---------------------|---------------------------------------|
| HW1,HW2,HW3,A1    | 86.34( $\pm$ 8.22)           | 88.1                | 15.97( $\pm$ 2.43)                    |
| HW1,HW2,HW3,A2    | 86.33 ( $\pm$ 12.22)         | 88.21               | 15.99( $\pm$ 2.97)                    |
| HW2,HW3,A1,A2     | 86.78 ( $\pm$ 12.45)         | 87.55               | 15.67( $\pm$ 1.89)                    |
| HW1,HW3,A1,A2     | 86.01 ( $\pm$ 13.1)          | 87.28               | 15.68( $\pm$ 2)                       |
| HW1,HW2,A1,A2     | 86.22 ( $\pm$ 9.01)          | 88.01               | 15.66 ( $\pm$ 2.34)                   |

Table S3 classification accuracies for walking speed classification using walk pattern established with three RBBMs.

| RBBMs combination | Mean( $\pm$ SD) accuracy (%) | Median Accuracy (%) | Avg. training time (mint.) |
|-------------------|------------------------------|---------------------|----------------------------|
| HW1,HW2, HW3      | 86.26 ( $\pm$ 12.1)          | 87.78               | 14.05( $\pm$ 3.03)         |
| HW1, HW2, A1      | 86.12( $\pm$ 12.01)          | 87.01               | 14.03( $\pm$ 3.44)         |
| HW1, HW2, A2      | 92.7( $\pm$ 8.01)            | 94.87               | 14.12( $\pm$ 1.97)         |
| HW1, HW3, A1      | 86.26( $\pm$ 10.22)          | 88.1                | 15.18( $\pm$ 2.01)         |
| HW1, HW3, A2      | 86.33( $\pm$ 13.22)          | 88.01               | 14.89( $\pm$ 2.22)         |
| HW2, HW3, A1      | 86( $\pm$ 11.22)             | 87.23               | 15.01( $\pm$ 2.93)         |
| HW2, HW3, A2      | 92.79( $\pm$ 7.8)            | 95                  | 14.01( $\pm$ 2.53)         |
| A1, A2, HW1       | 86( $\pm$ 12.22)             | 88.23               | 14.35( $\pm$ 2.11)         |
| A1, A2, HW2       | 86.1( $\pm$ 10.22)           | 89                  | 14.35( $\pm$ 1.97)         |
| A1, A2, HW3       | 86.12( $\pm$ 10.99)          | 87.44               | 14.47( $\pm$ 2.01)         |

Table S4 classification accuracies for walking speed classification using walk pattern established with two RBBMs.

| <b>RBBMs combination</b> | <b>Mean(<math>\pm</math>SD) accuracy (%)</b> | <b>Median accuracy (%)</b> | <b>Avg. training time (mint.)</b> |
|--------------------------|----------------------------------------------|----------------------------|-----------------------------------|
| HW1,HW2                  | 71.12( $\pm$ 12.09)                          | 72.97                      | 13.00( $\pm$ 2.22)                |
| HW1,HW3                  | 68.79 (5.81)                                 | 70.1                       | 13.05( $\pm$ 1.89)                |
| HW2,HW3                  | 71.9(11.04)                                  | 72.97                      | 13.03( $\pm$ 2.12)                |
| HW1, A1                  | 65.15(17.11)                                 | 67.09                      | 13.18( $\pm$ 3.34)                |
| HW1, A2                  | 73.01(10.01)                                 | 75.85                      | 13.01( $\pm$ 2.53)                |
| HW2, A1                  | 71(15.07)                                    | 73                         | 13.10( $\pm$ 2.17)                |
| HW2, A2                  | 72.89(11)                                    | 73.1                       | 12.67( $\pm$ 1.89)                |
| HW3, A1                  | 68.32(15.67)                                 | 70.03                      | 13.50( $\pm$ 2.12)                |
| HW3, A2                  | 73.22(9.97)                                  | 75.71                      | 12.89( $\pm$ 3.34)                |
| A1, A2                   | 73(10)                                       | 75.8                       | 13.23( $\pm$ 2.67)                |

Table S5 classification accuracies for walking speed classification using walk pattern established with one RBBMs.

| <b>RBBMs combination</b> | <b>Mean(<math>\pm</math>SD) accuracy (%)</b> | <b>Median accuracy (%)</b> | <b>Avg. training time (mint.)</b> |
|--------------------------|----------------------------------------------|----------------------------|-----------------------------------|
| HW1                      | 68.26( $\pm$ 12.05)                          | 70.01                      | 11.05( $\pm$ 3.44)                |
| HW2                      | 68.02( $\pm$ 15.78)                          | 69.72                      | 12.92( $\pm$ 1.97)                |
| HW3                      | 68.89( $\pm$ 15.02)                          | 69.85                      | 12.12( $\pm$ 2.11)                |
| A1                       | 65.13( $\pm$ 10.24)                          | 67.55                      | 10.18( $\pm$ 2.22)                |
| A2                       | 65.51( $\pm$ 17.59)                          | 67.92                      | 12.01( $\pm$ 2.01)                |
